# Supplementary material for: Assessment of a new score for capsule endoscopy in pediatric Crohnʼs disease (CE-CD)
Source: PubMed Central journal article supplement — Endosc Int Open. 2021 Sep 16;9(10):E1480–90. doi: 10.1055/a-1522-8723 (PMC8445685; doi:10.1055/a-1522-8723), 2021-09-16
Supplement: 2191supmat_10-1055-a-1522-8723.pdf [file 2191supmat_10-1055-a-1522-8723.pdf]

## Supplementary material

**Supplementary Fig. 1** CE-CD score of patients in clinical remission (green), with mild (yellow) or moderate to severe (red) inflammation according to PCDAI.

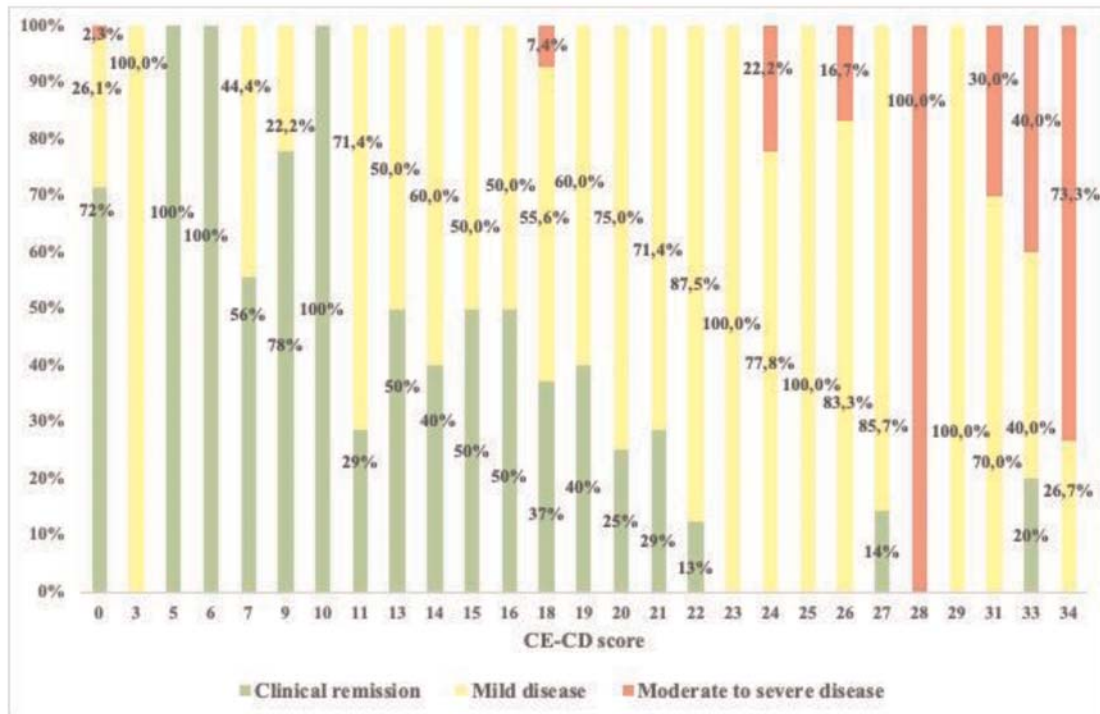

**Supplementary Fig. 2** Receiver operating characteristic (ROC) curves for a FC and b PCDAI assessing the presence of SB inflammation (CE-CD  $\geq 9$ ).

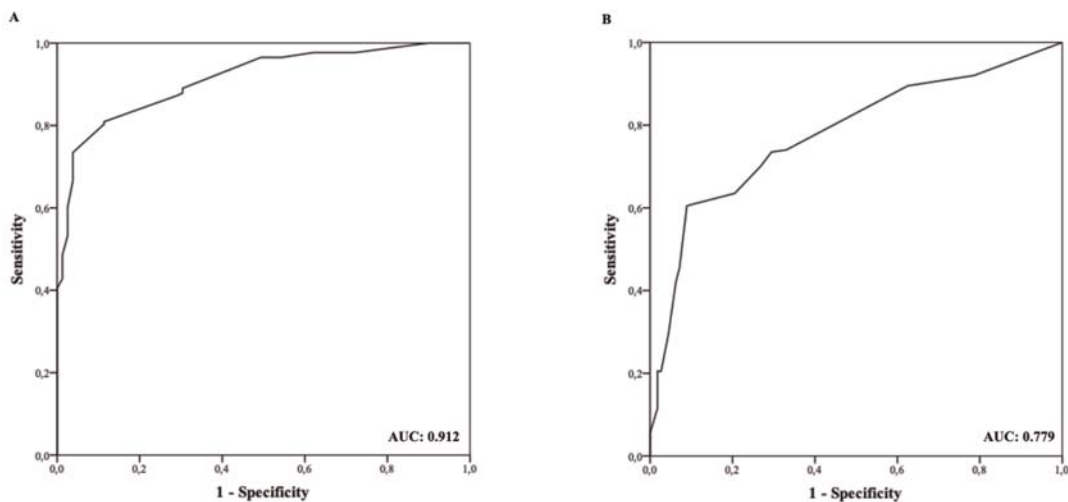

## Supplementary material

**Supplementary Table 1** – Correlations among capsule endoscopy scores and clinical and laboratory data in the entire population and in patients with isolated small-bowel involvement.

| Entire population       |           |             |           |           |            |           |           |           |
|-------------------------|-----------|-------------|-----------|-----------|------------|-----------|-----------|-----------|
|                         | CE-CD     | Lewis score | CECD AI   | PCDAI     | Hemoglobin | Albumin   | CRP       | FCP       |
| <b>CE-CD</b>            | -         | r = 0.581   | r = 0.909 | r = 0.624 | r = -0.751 | r = 0.702 | r = 0.685 | r = 0.561 |
| <b>Lewis score</b>      | r = 0.581 | -           | r = 0.724 | r = 0.633 | r = -0.537 | r = 0.512 | r = 0.537 | r = 0.636 |
| <b>CECD AI</b>          | r = 0.909 | r = 0.724   | -         | r = 0.651 | r = -0.746 | r = 0.664 | r = 0.679 | r = 0.642 |
| SB isolated involvement |           |             |           |           |            |           |           |           |
|                         | CE-CD     | Lewis score | CECD AI   | PCDAI     | Hemoglobin | Albumin   | CRP       | FCP       |
| <b>CE-CD</b>            | -         | r = 0.610   | r = 0.906 | r = 0.734 | r = -0.782 | r = 0.714 | r = 0.721 | r = 0.620 |
| <b>Lewis score</b>      | r = 0.610 | -           | r = 0.772 | r = 0.728 | r = -0.595 | r = 0.604 | r = 0.558 | r = 0.703 |
| <b>CECD AI</b>          | r = 0.906 | r = 0.772   | -         | r = 0.759 | r = -0.778 | r = 0.689 | r = 0.713 | r = 0.734 |

CE-CD, capsule endoscopic-Crohn's Disease; CECD AI, Capsule Endoscopy Crohn's Disease Activity Index; PCDAI, pediatric Crohn's Disease Activity Index; CRP: C-reactive protein; FCP: fecal calprotectin; SB: small bowel. All correlations were statistically significant at < 0.001 level.

## Supplementary material

**Supplementary Table 2** - Comparison of median time (months) of occurrence of endoscopic or clinical relapse, in patients in clinical remission (PCDAI<10) with or without mucosal inflammation.

|                           | CE-CD<9      | CE-CD ≥9  | P value |
|---------------------------|--------------|-----------|---------|
| <b>Endoscopic relapse</b> | 18 (15-21)   | 12 (9-15) | <0.001  |
| <b>Clinical relapse</b>   | 17 (12.5-21) | 11 (8-13) | <0.001  |

**Supplementary Table 3** – Diagnostic accuracy of FC and PCDAI for presence of inflammation (CE-CD ≥9) at CE

|                    | Sn    | Sp    | PPV   | NPV   | Accuracy |
|--------------------|-------|-------|-------|-------|----------|
| <b>FC ≥110µg/g</b> | 89%   | 69,6% | 86.5% | 74.3% | 83%      |
| <b>FC ≥75µg/g</b>  | 97.7% | 38%   | 77.5% | 88.2% | 79%      |
| <b>PCDAI ≥15</b>   | 60.5% | 90.1% | 91.7% | 56.1% | 71.2%    |
| <b>PCDAI ≥7.5</b>  | 73.5% | 29.5% | 65%   | 38.8% | 57.7%    |

Sn: sensitivity; Sp: specificity; PPV: positive predictive value; NPV: negative predictive value.
